# Supplementary material
Source: Research Square preprint supplement (doi:10.21203/rs.3.rs-9862545/v1)
Supplement: Supplementary file 1 [file 83e0f955cc7825409a12e354.docx]

**Supplementary Table 1** Risk factors associated with incident CVD in T2DM patients (N = 421)

|  | **Parameter** | **Model 1** |  | **Model 2** |  | **Model 3** |  | **Model 4** |  | **Model 5** |  |
| --- | --- | --- | --- | --- | --- | --- | --- | --- | --- | --- | --- |
|  |  | **ORa**  **(95% CI)** | **P-value** | **aORb**  **(95% CI)** | **P-value** | **aORc**  **(95% CI)** | **P-value** | **aORd**  **(95% CI)** | **P-value** | **aORe**  **(95% CI)** | **P-value** |
| **Age, year** | | 1.051  (1.005, 1.099) | 0.029* | 1.058  (1.007, 1.112) | 0.025* | 1.049  (0.991, 1.11) | 0.098 | 1.050  (0.992, 1.111) | 0.090 | 1.033  (0.981, 1.088) | 0.224 |
| **Gender** | |  |  |  |  |  |  |  |  |  |  |
|  | Female | 1 |  | 1 |  | 1 |  | 1 |  | 1 |  |
|  | Male | 1.913  (1.018, 3.594) | 0.044* | 1.745  (0.915, 3.330) | 0.091 | 1.395  (0.670, 2.904) | 0.374 | 1.392  (0.670, 2.893) | 0.375 | 1.541  (0.750, 3.165) | 0.239 |
| **Race** | |  |  |  |  |  |  |  |  |  |  |
|  | Chinese | 1 |  | 1 |  | 1 |  | 1 |  | 1 |  |
|  | Malay | 1.025  (0.450, 2.334) | 0.953 |  |  | 0.930  (0.387, 2.236) | 0.871 | 0.931  (0.388, 2.230) | 0.872 | 0.999  (0.419, 2.380) | 0.998 |
|  | Indian | 3.718  (1.824, 7.580) | <0.001* |  |  | 3.728  (1.550, 8.967) | 0.003* | 3.893  (1.690, 8.967) | 0.001* | 3.543  (1.510, 8.312) | 0.004* |
| **Duration of diabetes, years** | | 1.068  (1.026, 1.113) | 0.001* |  |  | 1.044  (0.995, 1.095) | 0.082 | 1.043  (0.994, 1.094) | 0.084 | 1.035  (0.990, 1.082) | 0.132 |
|  | HbA1c (%) | 1.048  (0.907, 1.211) | 0.524 |  |  |  |  |  |  |  |  |
| **Fasting blood glucose (mmol/L)** | | 0.935  (0.834, 1.049) | 0.253 |  |  |  |  |  |  |  |  |
|  | Good control  (< 7.0%) | 1 |  | 1 |  | 1 |  | 1 |  | 1 |  |
|  | Poor control  (≥ 7.0%) | 1.438  (0.788, 2.623) | 0.237 |  |  |  |  |  |  |  |  |
| **Cholesterol corrected (mmol/L)** | | 0.663  (0.500, 0.878) | 0.004* |  |  | 1.240  (0.410, 3.754) | 0.703 | 1.211  (0.400, 3.672) | 0.735 | 1.099  (0.368, 3.281) | 0.865 |
| **HDL (mmol/L)** | | 0.612  (0.240, 1.565) | 0.305 |  |  |  |  |  |  |  |  |
| **LDL (mmol/L)** | | 0.706  (0.526, 0.948) | 0.021* |  |  | 1.376  (0.470, 4.027) | 0.561 | 1.453  (0.492, 4.291) | 0.499 | 1.247  (0.424, 3.664) | 0.688 |
| **Triglyceride (mmol/L)** | | 0.754  (0.481, 1.182) | 0.219 |  |  |  |  |  |  |  |  |
| **Non-HDL** | | 0.670  (0.499, 0.900) | 0.008* |  |  | 0.513  (0.156, 1.691) | 0.273 | 0.504  (0.152, 1.676) | 0.264 | 0.623  (0.189, 2.053) | 0.437 |
| **eGFR** | | 0.986  (0.970, 1.004) | 0.122 |  |  |  |  |  |  |  |  |
| **BMI (kg/m2)** | | 0.948  (0.879, 1.021) | 0.159 |  |  |  |  |  |  |  |  |
| **Systolic BP (mmHg)** | | 0.994  (0.977, 1.011) | 0.466 |  |  |  |  |  |  |  |  |
| **Smoking status** | |  |  |  |  |  |  |  |  |  |  |
|  | No | 1 |  | 1 |  | 1 |  | 1 |  | 1 |  |
|  | Yes | 1.333  (0.631, 2.816) | 0.451 |  |  |  |  |  |  |  |  |
| **Retinopathy status** | |  |  |  |  |  |  |  |  |  |  |
|  | No | 1 |  | 1 |  | 1 |  | 1 |  | 1 |  |
|  | Yes | 1.088  (0.240, 4.938) | 0.913 |  |  |  |  |  |  |  |  |
| **Medication status** | |  |  |  |  |  |  |  |  |  |  |
| **Diabetes** | |  |  |  |  |  |  |  |  |  |  |
|  | No | 1 |  | 1 |  | 1 |  | 1 |  | 1 |  |
|  | Yes | 2.651  (1.249, 5.630) | 0.011* |  |  | 1.137  (0.448, 2.887) | 0.787 | 1.130  (0.446, 2.865) | 0.797 | 1.142  (0.450, 2.898) | 0.779 |
| **Hypertension** | |  |  |  |  |  |  |  |  |  |  |
|  | No | 1 |  | 1 |  | 1 |  | 1 |  | 1 |  |
|  | Yes | 2.085  (1.110, 3.917) | 0.022* |  |  | 1.780  (0.823, 3.85) | 0.143 | 1.802  (0.835, 3.889) | 0.133 | 1.790  (0.836, 3.83) | 0.134 |
| **Retinal vascular features** | |  |  |  |  |  |  |  |  |  |  |
|  | CRAE (µm) | 0.766  (0.556, 1.055) | 0.103 | 1.707  (0.143, 20.323) | 0.672 | 1.653  (0.123, 22.289) | 0.705 |  |  |  |  |
|  | CRVE (µm) | 1.038  (0.772, 1.396) | 0.805 | 0.472  (0.029, 7.785) | 0.600 | 0.490  (0.026, 9.228) | 0.634 |  |  |  |  |
|  | Log TORTA – median | 1.343  (1.003, 1.800) | 0.048* | 1.298  (0.949, 1.776) | 0.103 | 1.034  (0.735, 1.453) | 0.849 |  |  | 1.076  (0.778, 1.489) | 0.659 |
|  | Log TORTV – median | 1.456  (0.970, 2.185) | 0.070 | 1.344  (0.884, 2.043) | 0.167 | 1.258  (0.799, 1.982) | 0.321 | 1.263  (0.808, 1.972) | 0.305 |  |  |
|  | AVR | 0.788  (0.577, 1.076) | 0.133 | 0.350  (0.013, 9.223) | 0.529 | 0.332  (0.011, 10.272) | 0.529 | 0.708  (0.499, 1.003) | 0.052 |  |  |
|  | FDA | 0.954  (0.710, 1.28) | 0.752 | 1.131  (0.674, 1.896) | 0.641 | 1.162  (0.672, 2.010) | 0.590 | 1.169  (0.676, 2.021) | 0.576 |  |  |
|  | FDV | 0.945  (0.707, 1.263) | 0.703 | 0.984  (0.591, 1.637) | 0.950 | 1.095  (0.617, 1.943) | 0.757 | 1.071  (0.607, 1.891) | 0.812 |  |  |

Odd ratio (OR) and 95% confidence interval (CI) were reported for both univariate and multivariate logistic regression analyses. Values for arteriole/venule tortuosity (TORTA/V) were normalised using loge transformation. * Significance at *P* < 0.05.

HbA1c, glycated hemoglobin A1c; HDL, high-density lipoprotein; LDL, low-density lipoprotein; eGFR, estimated glomerular filtration rate; BMI, body mass index; BP, blood pressure. CVD, cardiovascular disease; T2DM, type 2 diabetes mellitus; CRAE/ CRVE, central retinal arteriole/venule equivalent; TORTA/V, arteriole/venule tortuosity; AVR, arteriovenous ratio; FDA/V, arteriole/venule fractal dimension.

a OR crude (model 1, univariate)

Adjusted (aOR):

b Model 2: Adjusted for age and gender.

c Model 3: Adjusted for all significant univariate parameters plus all RVFs (CRAE, CRVE, TORTA, TORTV, AVR, FDA, FDV).

d Model 4: Adjusted for all significant univariate parameters plus four RVFs (TORTV, AVR, FDA, FDV).

e Model 5: Adjusted for all significant univariate parameters plus one RVF (TORTA).
